# Supplementary material for: A cross-sectional study on the effects of bedtime administration of selective α1 adrenoceptor antagonists on nocturnal blood pressure in elderly patients with benign prostate hyperplasia
Source: PeerJ journal article supplement (doi:10.7717/peerj.19165), 2025-04-01

## Flow Diagram

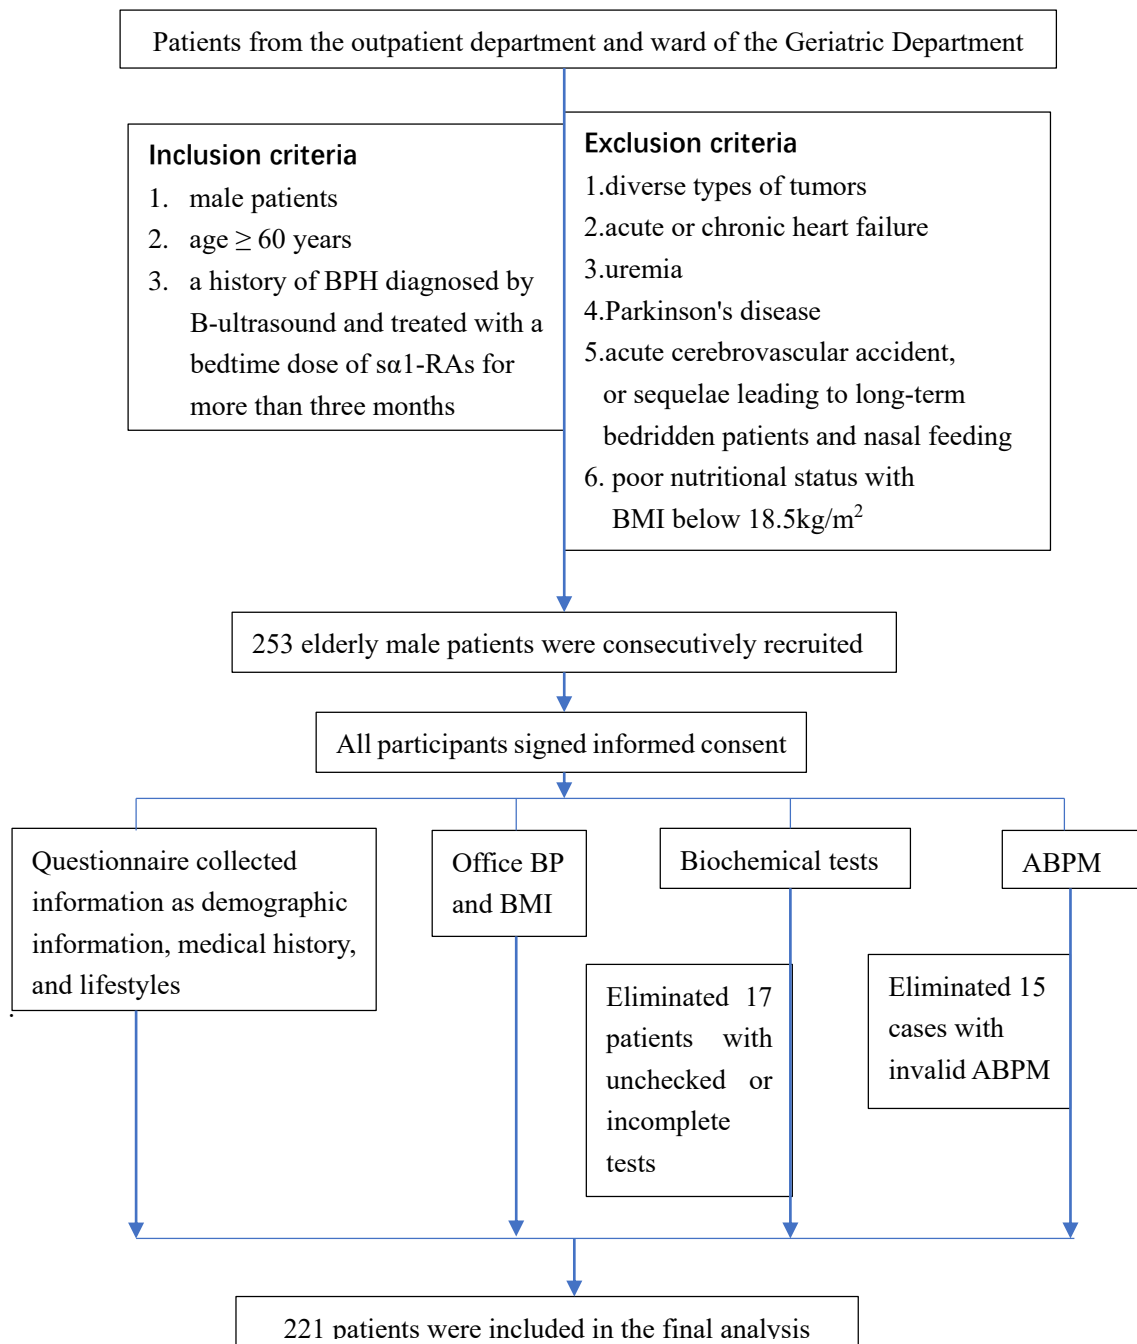

Supplement: FlowDiagram.pdf [file FlowDiagram.pdf]
