# Supplementary material for: A cross-sectional study on the effects of bedtime administration of selective α1 adrenoceptor antagonists on nocturnal blood pressure in elderly patients with benign prostate hyperplasia
Source: PeerJ. 2025 Apr 1;13:e19165. doi: 10.7717/peerj.19165 (PMC11970415; doi:10.7717/peerj.19165)
Supplement: Supplemental Information 1 [file peerj-13-19165-s001.xlsx]

## Sheet: Data
ID	Initial of name	Hypertension	Diabetes mellitus	Current drinkers	Current smokers	Take other antihypertensive drugs at night	sα1-RAs types	sα1-RAs dosage	Abnormal circadian rhythm	Age, years	BMI, kg/m2	Fasting blood glucose, mmol/L	Serum total cholesterol, mmol/L	eGFR, ml/min/1.73m²	Duration of medication, years	Office SBP, mm Hg	Office DBP, mm Hg	SBP24h, mm Hg	DBP24h, mm Hg	SBPd, mm Hg	DBPd, mm Hg	SBPn, mm Hg	DBPn, mm Hg
1001	WJS	0	1	0	0	0	1	1	0	64.0575	29.41	8.5	6	0.322201	2.99	184	96	137.769	83.0479	145.345	87.0852	119.866	72.3966
1002	CYQ	0	0	0	0	0	2	2	0	67.8274	23.05	5.7	5.22	0.323347	3.43	134	90	114.327	72.4813	122.254	78.8605	103.756	65.2889
1003	WXQ	1	0	0	1	0	1	1	1	61.2877	26.79	5.2	4.55	0.3435	1.1	144	78	137.102	90.6403	133.722	90.3483	128.133	81.4778
1004	CZD	0	0	0	1	0	1	1	1	62.3288	23.53	5.7	5.72	0.274124	1.95	166	106	129.873	90.941	151.919	105.3	103.828	75.1222
1005	CZJ	0	0	0	0	0	1	1	1	62.0082	26.75	5.2	5.06	0.328581	2.4	146	91	133.431	79.2507	149.46	89.8492	112.833	68.25
1006	JH	0	0	0	0	0	1	1	1	67.0822	24.69	4.82	4.3	0.468552	2.4	126	79	114.265	77.0556	117.655	82.0233	110.083	71.3333
1007	DJS	0	0	0	0	0	3	3	1	82.0603	25.95	5.5	4.1	0.277482	1.39	160	90	135.764	67.1229	134.617	65.8383	125.856	61.2528
1008	ZDD	0	0	0	0	0	3	1	0	70.5151	21.01	4.6	5	0.281567	3.71	150	80	110.48	66.0667	118.231	70.407	100.092	56.3694
1009	FCH	0	0	0	0	0	3	3	0	64.5562	25.71	4.92	3.6	0.383897	2.4	144	86	132.476	89.5306	140.882	94.275	117.881	80.8278
1010	HXF	0	0	0	0	0	3	3	1	76.9233	23.24	5.9	4.66	0.277217	2.64	152	70	150.123	65.65	149.81	65.4178	147.586	64.5056
1011	LHC	0	0	0	0	0	2	2	1	75.6301	31.99	5.6	4.27	0.37916	1.95	150	90	144.313	81.1063	148.318	85.6567	141.639	78.6639
1012	LYF	0	0	0	0	0	2	2	0	65.8795	26.15	4.76	4	0.242093	2.4	162	90	137.7	79.3132	151.48	86.8967	114.989	70.4028
1013	XSZ	0	0	1	0	0	1	1	1	62.4082	23.05	4.68	4.4	0.380205	3.43	145	87	143.36	84.5743	135.718	84.2986	145.689	80.3056
1014	LYY	0	0	0	0	0	1	1	1	65.6959	28.73	5.63	3.4	0.46166	2.4	143	79	93.8292	62.0722	99.217	64.8013	78.9105	51.2992
1015	CZX	0	0	0	0	0	2	2	1	63.2795	28.01	6	5.29	0.411131	3.04	200	100	128.868	60.4764	132.171	59.5528	122.109	59.493
1016	TFS	0	1	0	0	0	2	2	0	70.9233	21.71	7	4.3	0.344498	2.4	160	100	162.38	86.6035	180.71	97.2633	144.95	74.9278
1017	WQ	0	0	0	0	0	1	1	1	68.8932	20.76	6.2	4.1	0.331618	3.04	160	92	155.871	90.6	175.074	101.786	109.55	61.6934
1018	LZL	0	0	1	0	0	3	3	1	62.3644	23.36	4.72	3.3	0.457539	1.1	130	85	117.348	77.3854	137.265	88.6156	86.7972	57.825
1019	SBY	0	0	0	0	0	2	2	1	80.6384	26.63	4.2	5.4	0.228489	3.04	150	90	148.283	86.9819	145.728	86.4608	152.517	91.8233
1020	ZZ	0	0	0	0	0	1	1	1	71.3315	30.42	4.3	4.8	0.25827	3.04	162	102	142.394	85.5778	135.628	82.0912	148	89.8333
1021	XK	0	0	0	1	0	1	1	1	65.5507	23.03	4.8	4.1	0.415461	2.77	152	96	148.982	85.8167	150.762	88.7695	145.581	81.4861
1022	GJG	0	0	0	1	0	1	1	0	69.1671	23.51	4.73	4.6	0.535137	2.4	140	80	127.863	76.4382	129.582	77.2836	109.989	62.0028
1023	GGZ	0	0	0	0	0	1	1	1	72.9123	25.07	3.1	5.2	0.314819	2.4	116	70	142.872	85.1778	129.379	79.7757	152.783	89.325
1024	CYX	0	0	0	0	0	2	2	0	76.9808	29.72	4.62	3.6	0.243387	2.77	158	80	119.459	65.6083	125.713	72.375	102.917	50.8333
1025	XZH	0	0	0	1	0	1	1	1	62.7945	24.45	5.93	7.6	0.425855	1.39	146	98	124.054	85.2972	132.957	91.66	105.667	71.3333
1026	JM	0	0	0	1	0	3	3	0	63.1918	24.62	4.83	4.1	0.418196	3.04	150	100	135.829	92.5563	141.279	98.201	117.772	79.4333
1027	ZYQ	0	0	0	1	0	1	1	0	62.3781	27.43	5	4.3	0.380238	1.61	144	102	139.398	94.6917	147.277	97.2675	117.056	84.4611
1028	SJH	0	0	0	0	0	1	1	1	72.0548	27.34	4.29	3.6	0.395085	3.04	170	80	146.011	67.8778	142.35	67.325	145.669	65.0778
1029	WJP	0	0	0	0	0	3	3	1	70.5233	20.57	5.8	5.3	0.285111	1.1	152	84	109.892	72.6306	111.927	73.55	103.742	67.8095
1030	BWD	0	0	0	1	0	1	1	1	75.4274	22.49	5.35	3.78	0.361866	3.04	140	86	130.109	78.5694	128.01	75.8933	129.981	81.4389
1031	LJC	0	0	0	0	0	1	1	0	83.9589	20.96	5.2	5.76	0.276349	2.4	130	80	118.287	73.9458	133.827	83.1333	107.333	68.2778
1032	ZDF	0	0	0	1	0	1	1	1	65.1288	26.12	5	4.1	0.321246	3.71	148	88	131.419	81.3389	131.559	79.7806	120.039	76.0139
1033	LJB	0	0	0	1	0	1	1	0	71.0137	23.12	6.4	4	0.396116	1.1	132	86	125.053	84.284	129.96	87.4274	105.656	73.1639
1034	LWC	0	0	0	1	0	2	2	1	63.0411	24.22	5.1	3.84	0.465082	1.1	160	100	151.183	88.6743	160.763	89.2192	130.952	84.3866
1035	ZXD	0	0	0	1	0	3	3	1	77.7507	25.09	5	4.19	0.524047	2.4	152	90	136.962	82.5826	141.715	83.6317	124.714	77.1028
1036	CBF	0	0	0	1	0	2	2	0	63.0603	28.22	5	5.04	0.448479	1.1	130	80	113.898	74.384	120.777	81.1683	101.408	62.4889
1037	LP	0	0	0	1	0	3	3	0	62.5288	28.73	5.3	3.77	0.433598	1.1	140	80	107.661	73.6319	116.507	77.6868	91.7417	66.8694
1038	YHZ	0	0	1	0	0	3	3	1	78.1753	27.55	5.6	4.2	0.201317	1.1	122	70	121.487	78.4611	126.25	81.4424	116.706	76.425
1039	QLY	0	0	1	1	0	1	1	1	66.1151	25.88	5.8	3.87	0.421945	0.69	140	88	126.355	80.6486	140.616	92.399	101.247	61.7611
1040	LCQ	0	0	0	0	0	1	1	1	60.2795	25.65	4.11	4.9	0.394874	0.69	120	80	117.185	78.3708	121.491	82.1074	109.611	73.5194
1041	SHB	0	0	0	0	1	2	2	1	60.8219	22.22	4.9	4.3	0.359376	3.04	173	102	123.811	79.9944	139.571	88.046	99.4302	65.7674
1042	LZC	0	0	1	0	0	2	2	1	64.9425	26.42	5.9	6.1	0.330448	1.79	130	80	136.761	82.6951	136.532	85.7667	147.667	80.3333
1043	TDM	0	0	0	0	0	3	3	0	60.8986	23.12	5	4.6	0.320728	1.39	141	89	127.764	92.3569	134.521	99.3765	113.7	80.4111
1044	BCF	0	0	1	1	0	3	3	0	64.463	24.77	4.6	3.8	0.530802	1.1	168	96	147.347	87.0028	152.153	90.32	133.883	76.6444
1045	CSC	0	0	0	0	1	1	1	1	77.0493	20.76	4.35	6.4	0.384045	3.71	164	94	123.354	73.3257	131.787	80.0951	99.0975	57.078
1046	LJQ	0	0	0	0	0	1	1	1	74.389	22.59	4.7	3.95	0.386468	3.43	180	90	160.282	84.9361	168.21	86.4762	145.844	78.6611
1047	RL	0	0	0	1	0	3	3	1	81.3452	19.23	4.4	4.5	0.420957	1.61	146	80	136.297	78.0965	128.177	75.5348	142.356	79.0795
1048	LHK	0	0	1	1	0	2	2	1	73.811	29.32	4.9	4.8	0.387008	1.1	133	86	143.03	88.8674	136.301	86.2287	144.867	89.4972
1049	HCL	0	0	0	1	0	2	2	1	64.4192	30.48	5.48	4.7	0.471962	1.79	147	87	152.235	89.4847	159.309	93.3182	143.633	83.3778
1050	LSF	0	0	0	0	0	3	3	1	68.4521	22.84	5.58	5.1	0.46686	1.39	140	83	108.335	67.1562	116.572	70.3183	98.7431	64.4648
1051	SDJ	0	0	0	0	0	1	1	1	72.2685	26.33	3.34	3.1	0.702939	0.69	152	88	116.943	65.9125	134.111	75.4209	94.0806	54.4917
1052	LJL	0	0	0	0	0	1	1	0	69.6438	25.34	4.8	3.4	0.425314	2.4	162	88	133.451	90.3535	139.995	98.1402	116.597	79.0583
1053	LHJ	0	0	0	0	0	1	1	0	66.4904	25.22	3.5	3.1	0.40081	0.69	148	80	114.153	76.4049	124.385	82.7838	100.072	67.5083
1054	WJR	0	0	1	0	0	3	3	0	71.411	22.09	5.1	6.3	0.359868	2.4	160	80	116.574	73.9368	125.855	77.5978	97.6639	63.7417
1055	LWD	0	0	0	1	0	2	2	0	79.2822	25.39	4.8	4.8	0.408449	2.4	150	80	123.553	66.9972	135.795	74.4564	110.056	59.7444
1056	YLY	0	0	0	0	0	1	1	1	67.4932	24.45	4.92	3.9	0.386964	2.2	154	88	130.651	77.6097	132.524	78.6077	122.725	73.3611
1057	LPR	0	0	0	0	0	1	1	1	62.3315	25.95	6.27	3.3	0.545198	1.61	112	80	112.499	81.6639	119.407	84.8704	102.936	78.1492
1058	CBZ	0	0	0	0	0	3	3	1	64.5507	22.04	4.8	5.7	0.454726	1.1	108	68	102.74	69.1396	116.407	78.8581	89.0444	57.8889
1059	ZQS	0	0	0	1	0	1	1	1	65.1781	19.82	4.5	4.7	0.383238	2.2	106	76	108.067	73.9639	108.465	77.1312	99.0083	65.2917
1060	ZFY	0	0	0	0	0	1	1	1	72.0932	21.63	4.7	4	0.376383	0.69	108	80	101.739	66.109	101.027	65.1383	99.6872	65.5419
1061	SHD	0	0	1	1	0	3	3	0	63.7507	25.95	4.96	4	0.410585	2.48	129	81	123.791	82.6333	130.968	86.3917	113.458	75.8722
1062	HYZ	0	0	0	0	0	2	2	1	74.7014	28.01	5.47	2.9	0.575579	2.4	170	110	142.056	84.8722	143.683	85.7817	129.725	77.2667
1063	ZGY	0	0	0	0	0	3	3	0	76.1616	27.73	4.5	4.4	0.246617	2.4	144	86	121.671	72.2979	127.297	78.6733	104.097	58.2284
1064	JJ	0	0	0	0	0	2	2	1	71.4521	23.41	4.88	4.2	0.532032	2.2	140	89	126.972	84.9132	125.586	83.571	120.831	81.8778
1065	GZM	0	0	0	1	0	2	2	1	63.5096	25.39	5.2	3.2	0.233447	1.1	194	118	178.141	111.776	181.878	115.568	165.325	101.717
1066	BMH	0	0	0	1	0	2	2	0	64.2521	29	4.33	4.1	0.61897	1.79	139	82	124.662	82.8257	127.525	84.3485	108.39	72.9415
1067	ZBK	0	0	0	1	0	3	3	1	65.0712	24.79	6.16	4.4	0.416007	2.77	215	96	171.456	91.5326	178.052	94.2337	160.925	85.2778
1068	DWJ	0	0	0	0	0	2	2	1	61.6384	25.83	5.3	4.9	0.442388	1.79	144	100	125.547	79.7979	124.412	83.515	116.5	70.5
1069	JGL	1	1	0	1	0	3	3	1	70.0575	30.11	7.39	4.64	0.325994	3.85	156	110	128.896	67.9688	141.194	76.2886	108.794	57.05
1070	CCF	1	0	0	0	0	2	2	1	62.0192	26.57	5.5	3.88	0.30714	2.77	140	90	150.073	74.0764	147	73.5433	140.208	70.7333
1071	WHG	1	0	0	0	0	3	3	0	61.6164	22.22	#NULL!	4.87	0.307498	2.48	160	90	121.538	77.8347	124.887	81.9367	108.183	64.1417
1072	YHL	1	0	0	1	1	1	1	1	65.6082	28.41	5.2	4.2	0.325278	2.94	150	100	136.322	91.6778	156.505	103.423	113.399	78.8595
1073	LBL	1	1	0	0	0	2	2	1	78.4795	23.24	6	4.45	0.315014	3.81	160	110	123.924	78.5389	124.469	79.8911	119.645	74.8394
1074	LBR	1	1	1	0	1	3	3	1	64.0411	25.71	7.6	3.72	0.424359	1.95	140	92	122.839	80.2278	119.455	81.1717	128.161	77.9222
1075	LRT	1	0	0	0	0	2	2	0	80.4274	30.67	4.3	3.73	0.255754	2.83	150	90	104.753	54.8438	108.29	57.7382	96.75	50.25
1076	BJX	1	0	0	0	0	2	2	1	73.874	30.07	5.5	4.81	0.237181	3.61	164	100	130.529	77.775	125.153	72.3133	138.667	83.5167
1077	CXY	1	1	0	0	0	2	2	1	84.3233	25.99	5	4.98	0.324431	3.61	150	90	117.912	67.466	118.52	68.4116	117.989	62.5
1078	WDP	1	0	0	0	0	3	3	1	64.3014	25.26	5.4	4.26	0.500012	3.61	150	100	131.32	82.284	130.39	77.4233	132.902	91.9776
1079	ZLR	1	0	0	0	1	3	3	1	71.3096	25.03	5.8	4.49	0.291878	3.3	150	95	134.39	92.2715	131.092	91.2521	138.725	92.1639
1080	XBY	1	1	0	0	0	1	1	1	80.2055	23.18	10.5	#NULL!	0.140174	2.83	140	90	138.898	71.3972	124.495	68.625	159.833	73.3139
1081	GSJ	1	1	0	0	0	1	1	1	65.3479	23.66	8.1	4.62	0.199389	3.61	160	90	117.938	74.5875	117.641	76.222	116.215	73.7852
1082	LBL	1	1	0	0	1	3	3	1	85.1616	26.13	6.9	4.28	0.403252	3.61	180	80	165.49	82.7424	162.283	81.3977	165.217	77.9
1083	MXY	1	1	1	1	0	2	2	1	72.211	22.86	6.3	3.5	0.401528	2.83	208	102	104.135	57.7847	111.294	61.0568	100.511	53.7583
1084	Q	1	0	0	1	0	3	3	0	65.9479	30.25	5.2	5.21	0.303781	3.66	150	105	130.753	78.3632	137.885	82.8467	124.003	69.9889
1085	YXY	1	0	0	0	0	2	2	1	64.0411	28.36	4.9	4.62	0.403512	2.56	150	100	114.744	78.4208	116.698	79.2338	111.089	76.5
1086	YTW	1	1	0	1	0	1	1	1	63.6712	26.47	13.9	5.37	0.341162	2.83	170	120	133.385	85.4319	132.987	83.7596	128.089	82.9194
1087	WMY	1	0	0	0	1	2	2	1	70.5178	26.93	4.9	4.57	0.339852	2.83	155	92	149.845	90.3132	160.715	94.9102	145.772	90.35
1088	FZS	1	0	0	0	0	1	1	0	82.537	21.5	5.2	3.97	0.29967	3.14	178	78	126.122	67.1035	136.885	73.6943	114.135	59.616
1089	JPY	1	0	0	0	0	1	1	1	81.5479	24.22	5.8	4	0.284952	3.95	180	95	90.0924	56.0014	101.55	63.5559	80.2879	48.2758
1090	SMZ	1	0	0	0	1	3	3	1	80.7808	24.98	5.6	5.41	0.210226	3.3	150	76	104.369	59.2528	119.271	67.2278	78.9554	46.5404
1091	ZSH	1	0	1	1	0	2	2	1	65.9315	23.7	5.3	5.9	0.334236	3.3	164	100	128.339	82.5375	119.487	79.7529	131.531	82.0778
1092	WXC	1	0	0	0	0	2	2	1	74.811	23.83	4.4	4.97	0.215293	3.58	140	86	130.778	86.9222	133.519	88.9834	131.561	85.8858
1093	LWY	1	0	1	1	1	1	1	0	65.7123	25.71	3.8	5.05	0.278193	2.77	176	116	122.996	88.8201	130.75	96.28	105.052	77.2424
1094	ZM	1	0	0	0	1	2	2	0	76.0493	19.1	5	5.42	0.261398	3.04	150	90	112.055	65.1597	118.855	68.3506	98.1188	58.4696
1095	QQM	1	0	0	0	0	3	3	1	74.7534	27.76	3.6	4.6	0.419957	3.58	128	80	122.016	71.2271	118.116	70.7316	120.056	70.2151
1096	BSH	1	1	0	0	0	2	2	1	69.3562	23.88	5.37	4.54	0.361754	3.61	140	90	113.938	80.6667	114.59	80.9783	107.636	76.5528
1097	BKF	1	0	0	0	1	1	1	1	72.2356	26.96	4.3	5.29	0.287505	3.26	126	97	106.619	65.434	103.818	63.38	104.2	62.4806
1098	DRJ	0	0	1	0	0	2	2	1	60.4	25.18	5.5	7.51	0.78743	1.95	120	90	100.367	75.441	99.9533	73.79	95.9528	73.2806
1099	FDS	1	1	0	1	0	1	1	0	63.2712	25.65	5.8	4.61	0.322914	2.64	146	85	138.481	84.341	143.902	88.1105	124.182	75.7282
1100	HCS	1	0	0	0	0	1	1	1	81.3123	25.1	5.6	3.37	0.255254	3.53	154	76	144.658	76.7062	137.11	74.5776	152.275	78.7639
1101	HWL	1	0	0	0	0	1	1	0	62.4137	27.73	5.4	4.84	0.310867	3.18	136	86	126.063	79.0028	132.352	84.2517	114.089	71.0444
1102	JXG	1	0	0	1	1	2	2	1	68.6055	24.09	5.5	3.67	0.313959	2.77	144	89	135.628	78.8847	138.173	78.8433	127.892	75.3
1103	LFG	1	0	0	0	0	1	1	1	62.2384	30.25	5.2	3.79	0.299074	3.14	138	90	130.035	86.9368	128.988	83.0317	121.083	84.75
1104	LKP	1	1	0	0	1	2	2	1	62.0356	26.35	10.1	3.96	0.44188	3.18	160	88	147.998	75.2215	151.389	79.7956	146.391	69.3857
1105	RBC	1	1	1	0	0	1	1	1	63.4767	24.26	8.5	8.54	0.346312	2.64	150	86	119.582	84.2535	121.938	84.0318	111.233	80.1083
1106	SRB	1	0	0	0	1	1	1	1	79	22.67	4.5	4.35	0.438578	2.08	126	88	111.684	63.516	110.073	63.9382	109.536	61.675
1107	SDF	1	0	1	0	0	2	2	1	62.0356	31.05	6.3	5.89	0.374751	3.37	140	90	130.086	85.0632	123.92	82.2228	145.961	87.8
1108	SGP	1	0	0	0	0	1	1	1	71.0384	25.26	5.6	4.83	0.271024	3.5	127	74	113.385	75.5979	125.927	82.4908	89.2702	58.9582
1109	SJK	1	0	0	1	0	1	1	0	60.2822	23.74	5.8	5.07	0.279108	2.64	150	96	128.177	82.0042	147.315	90.3383	111.206	73.675
1110	WDM	1	0	0	0	0	1	1	1	67.4411	35.44	6.5	5.04	0.310704	3.4	150	86	129.501	81.7375	136.053	84.5025	115.471	77.9256
1111	WJS	1	0	0	0	0	1	1	1	86.0548	25.91	5.2	6.08	0.314211	3.58	160	78	146.471	79.6014	146.715	77.3267	137.583	79.0833
1112	WCS	1	1	1	0	0	3	3	1	67.6959	25.99	7.4	5.11	0.413073	2.48	140	76	130.218	81.8806	128.102	81.4925	128.539	79.0611
1113	WQH	1	1	0	0	0	1	1	1	84.1616	24.22	7.2	3.76	1.01999	2.4	150	60	137.557	65.6674	136.525	65.6312	139.033	67.3912
1114	XDZ	1	1	0	0	0	1	1	1	66.6795	28.73	5	4.18	0.358837	3.66	140	72	162.142	99.6937	160.622	99.43	158.867	98.475
1115	XHQ	1	0	0	0	0	1	1	0	63.8247	25.35	4.8	5.14	0.24347	3.78	136	86	126.685	90.8187	131.213	94.6183	117.008	82.2045
1116	YCJ	1	0	0	0	1	3	3	1	77.9836	24.61	4.9	5.13	0.248385	2.77	160	90	132.345	75.7611	137.363	75.74	126.042	75.5861
1117	YTM	1	0	0	0	0	1	1	0	73.4384	23.14	3.8	4.72	0.444347	1.95	126	72	121.856	72.8264	129.38	75.2023	102.75	62.5833
1118	YHD	1	0	0	1	0	1	1	1	74.5205	22.99	5.6	4.74	0.351766	3.78	124	90	125.251	84.0465	128.18	86.65	117.519	77.3611
1119	ZZJ	1	1	0	0	1	1	1	1	64.4849	25.95	7.6	5.25	0.340388	2.08	130	70	127.583	65.6285	143.16	75.0123	99.3778	46.9333
1120	HWX	1	0	0	0	0	1	1	1	61.0384	23.32	5.3	3.33	0.25952	1.61	138	88	121.925	80.9236	122.742	79.1733	120.682	84.0718
1121	WYM	1	0	0	0	1	1	1	1	67.9288	36.65	5.5	3.42	0.458906	3.87	183	84	114.401	70.284	115.332	70.3	106.553	66.8861
1122	FYF	1	0	0	0	0	3	3	0	61.4575	23.28	5.1	3.07	0.504077	2.3	121	65	122.963	73.8931	127.848	76.75	114.022	68.9889
1123	CPJ	1	1	0	0	0	1	1	1	60.5918	32.61	8.4	4.26	0.329943	2.3	160	100	144.243	96.3708	147.278	99.2467	133.2	91.9154
1124	CFM	1	0	0	0	1	1	1	1	65.2521	28.4	4.5	4.12	0.308402	3	145	100	108.605	74.9931	106.933	74.1422	110.061	73.425
1125	CTC	1	0	1	1	0	1	1	1	67.0411	22.15	4.9	4.53	0.324023	2.2	120	70	120.509	80.5639	115.155	79.049	129.286	82.4639
1126	CZY	1	0	0	0	0	2	2	1	80.7452	20.9	3.5	4.47	0.210243	2.4	160	88	132.23	83.784	127.377	75.4967	130.858	87.7833
1127	CJZ	1	0	0	0	1	2	2	1	63.474	26.73	4.9	5.21	0.341352	3.56	132	100	130.343	91.2361	134.025	95.4383	126.486	86.9194
1128	DMF	1	0	0	0	0	3	3	1	61.5644	25.46	4.9	3.84	0.348213	1.61	180	120	130.827	86.1708	134.016	84.1039	114.808	78.6083
1129	FXZ	1	1	0	1	0	2	2	1	64.1315	24.8	5.2	5.26	0.331193	3.56	195	95	157.728	77.1063	147.086	74.4491	169.531	80.6778
1130	FXD	1	0	0	0	0	1	1	1	63.8164	28.57	5.8	4.57	0.297737	3	121	90	152.83	91.0271	159.432	92.0445	147.019	88.2694
1131	FBH	1	0	0	0	1	3	3	1	64.0082	24.06	3.2	3.39	0.397007	3.22	161	85	133.183	81.1965	137.169	82.9104	132.411	80.8444
1132	FLY	1	0	0	0	0	1	1	1	61.9507	29.75	4.8	5.29	0.33325	2.08	129	78	111.729	73.1535	115.23	76.84	104.058	67.6222
1133	GYH	1	1	0	0	0	2	2	0	67.3726	26.12	8.3	4.09	0.477095	3.22	160	90	114.517	73.3889	121.027	77.1033	101.4	64.9333
1134	GZY	1	1	0	0	0	2	2	1	66.9753	26.85	5.4	4.94	0.291422	2.71	148	94	141.991	92.809	160.933	102.612	115.052	76.7569
1135	JYD	1	0	0	1	0	3	3	1	72.0603	21.56	5.1	4.59	0.27702	3.04	209	93	150.312	81.6604	167.662	90.34	131.903	72.2333
1136	ZCA	1	0	0	0	0	3	3	1	74.8685	29.3	5.2	4.41	0.326717	2.71	171	84	125.947	80.0021	135.12	81.6578	115.936	77.7139
1137	LYF	1	0	0	1	0	2	2	1	67.8904	26.33	6.4	4.21	0.419949	2.83	146	90	118.939	77.8167	135.515	88.3717	102.106	66.1732
1138	LJR	1	0	1	0	0	1	1	1	63.8	25.35	5.9	5.34	0.410528	2.48	127	77	131.453	84.8826	130.456	82.0971	132.917	87.2361
1139	LZZ	1	0	0	0	0	1	1	1	71.3014	24.22	4.7	7.04	0.33918	2.71	160	90	153.422	86.0576	159.503	87.7383	144.833	82.9167
1140	PYN	1	0	1	0	0	3	3	0	65.1699	26.83	5.6	4.81	0.316859	1.95	170	98	152.665	94.1104	161.935	100.789	130.061	78.6611
1141	QZQ	0	0	0	0	0	1	1	0	60.0082	28.73	5.7	4.31	0.325989	2.3	114	74	109.735	73.0278	115.739	77.6506	102.019	66.0444
1142	RLS	1	1	1	1	0	1	1	1	61.5808	29.58	7.7	4.77	0.503896	1.61	156	98	155.026	95.8792	155.278	98.1256	155.475	92.9667
1143	SCD	1	0	1	0	0	1	1	1	67.0301	24.16	5.6	4.94	0.315267	2.71	155	100	124.294	78.4264	122.114	76.9851	116.592	72.4722
1144	SCS	1	1	0	1	0	3	3	1	68.0438	25.25	10.2	4.3	0.310209	3.56	164	100	165.308	84.7215	168.173	88.0017	158.85	78.1833
1145	SQH	1	1	0	0	0	2	2	1	64.2055	21.97	7.6	4.95	0.384271	3.81	190	90	136.643	72.5924	145.024	75.4869	124.992	68.9861
1146	FQL	1	0	0	0	1	1	1	1	64.4247	26.12	5.1	4.12	0.350475	3.89	158	72	131.98	76.8458	128.544	75.3522	132.411	75.8306
1147	LHZ	1	0	1	1	0	1	1	1	66.2986	23.67	4.5	3.62	0.320224	2.08	140	100	114.447	82.4243	110.74	78.9432	116.986	85.5602
1148	QZL	1	0	0	0	0	3	3	1	84.0466	22.32	5.2	3.79	0.339162	3.99	150	80	118.673	61.5903	120.237	63.8533	110.355	58.8512
1149	SLH	1	0	0	1	0	1	1	1	60.0384	25.01	4.9	4.08	0.179427	2.3	212	110	171.231	103.629	173.025	103.91	161.65	99.2444
1150	WZM	1	1	0	0	0	1	1	1	73.5507	28.36	5.5	3.56	0.363501	3.81	133	72	125.511	73.1757	119.663	71.755	134	76.1667
1151	DSF	1	0	0	1	0	1	1	1	63.0384	28.4	5.4	4.44	0.287273	2.94	154	97	111.735	64.8319	125.631	73.6566	92.0194	53.675
1152	QYX	1	0	0	0	0	2	2	1	77.0493	27.73	5.4	5.63	0.339427	3.18	176	76	131.665	71.7007	132.353	72.0817	133.081	74.4139
1153	XLK	1	0	0	0	1	2	2	1	77.0493	27.23	4.8	5.23	0.267112	3.18	137	121	125.074	73.4125	126.042	74.7	115.423	67.9415
1154	JYT	1	1	0	0	1	3	3	1	61.463	28.41	#NULL!	6.1	0.35344	2.64	130	80	130.915	78.959	143.216	87.717	112.189	64.0556
1155	WGZ	1	0	1	1	1	2	2	1	61.1534	27.76	5.4	4.19	0.316195	2.08	130	80	134.675	80.9611	155.838	93.8798	106.456	63.4201
1156	WXY	1	0	0	1	0	1	1	0	62.0466	27.72	5	5.86	0.412581	2.71	180	118	124.832	85.4972	132.194	89.7609	112.56	78.4037
1157	WZQ	1	0	0	0	0	3	3	0	68.1973	27.55	4.4	5.04	0.336994	2.71	153	92	114.522	78.9264	122.052	84.13	102.367	69.3639
1158	XZY	1	0	1	0	0	3	1	1	73.7205	27.49	5.6	3.47	0.380899	2.08	125	76	116.231	65.4313	118.46	68.955	113.536	58.933
1159	YZG	1	0	0	0	0	2	2	0	66.2849	25.28	4.1	4.25	0.333917	2.71	138	78	107.787	67.2347	112.678	69.7127	89.9	57.5639
1160	ZRX	1	0	0	0	0	2	2	1	77.6164	24.31	4.9	4.18	0.324616	3.56	146	78	132.722	76.484	130.716	77.3706	126.847	70.1444
1161	ZSX	1	0	0	0	1	3	3	0	64.9452	25.5	5.7	3.8	0.395975	3.76	196	120	112.746	77.325	117.701	81.2548	96.9053	62.8078
1162	ZYH	1	0	0	1	0	2	2	1	60.3205	22.49	4.7	4.51	0.293199	2.08	120	80	123.365	81.5875	128.206	86.1359	120.702	76.8022
1163	ZYZ	1	0	0	1	0	1	1	0	65.1836	26.73	5.4	5.33	0.321197	2.3	118	88	118.691	83.1528	127.047	89.612	102.492	70.8778
1164	JDF	1	1	0	0	0	1	1	1	81.9479	28.2	3.9	3.93	0.257926	3.33	162	68	128.702	76.0014	126.376	75.1955	128.264	70.6972
1165	LHR	1	1	0	0	0	1	1	1	79.7836	30.19	7.3	5.55	0.189561	3.22	195	105	176.085	93.6889	177.915	94.9548	175.892	96.2278
1166	LXL	1	0	0	0	0	3	3	1	65.4658	28.39	4.7	4.34	0.334661	3.22	182	106	125.528	80.366	128.941	81.8037	125.814	81.7806
1167	LDL	1	1	0	0	0	2	2	1	62.0082	27.68	5.9	4.22	0.239491	3.26	160	110	131.797	85.409	133.65	86.4883	124.711	80.1806
1168	LHF	1	0	1	0	0	1	1	0	62.3425	22.57	6.4	4.41	0.352542	3	130	80	123.365	82.9021	129.655	87.88	111.751	72.3615
1169	SFZ	1	0	0	1	1	1	1	1	62.0575	26.85	6	3.16	0.503201	3.87	180	110	140.881	85.9847	139.772	84.2842	139.184	85.9777
1170	YYM	1	0	0	0	0	1	1	1	69.2521	25.46	5.2	3.69	0.367441	3.18	164	74	134.652	70.9347	135.494	69.6007	127.758	71.0972
1171	CJN	1	0	1	1	0	1	1	1	60.0384	34.41	5.1	3.83	0.506189	3.22	130	90	133.594	84.384	135.662	85.2692	126.93	77.4523
1172	SBL	1	0	1	1	0	2	2	1	64.0932	26.64	4.8	4.81	0.157179	2.77	187	108	164.258	93.3632	171.212	97.79	154.531	87.1694
1173	TTP	1	0	0	0	0	3	3	0	66.3753	24.91	4.1	4.91	0.281125	2.71	185	100	127.205	84.6389	141.512	92.1117	113.392	77.4111
1174	WLZ	1	0	0	0	0	2	2	1	73.8192	30.1	5.3	#NULL!	0.322	2.71	126	72	115.426	76.7778	117.656	81.8604	115.933	71.6917
1175	WYQ	1	0	0	0	0	1	1	1	82.0521	27.68	6.1	4	0.264121	2.71	121	79	137.542	75.2097	123.248	71.2312	155.728	80.9048
1176	XSZ	1	0	0	0	0	3	3	1	75.1534	23.2	4.9	4.04	0.30474	2.48	116	58	123.944	78.6424	125.742	79.2717	114.641	71.8978
1177	WGQ	1	0	0	0	0	2	2	1	64.3699	27.04	4.5	6.51	0.355747	3.83	150	100	135.37	85.3375	121.174	74.5263	139.039	90.6
1178	WZH	1	0	0	0	0	2	2	1	61.1863	26.26	3.6	4.43	0.288811	3.26	158	82	120.546	75.0264	120.762	75.1866	115.956	67.2389
1179	WWS	1	1	0	0	0	1	1	1	83.0658	21.97	3.5	4.84	0.322	3.83	160	80	114.765	65.2062	113.505	67.825	114.331	63.4769
1180	BFN	1	1	0	0	0	3	3	1	81.3151	25.16	3.8	4.88	0.135897	3.83	215	90	150.331	64.3312	136.185	64.1	170.183	62.4083
1181	HMR	1	1	1	1	0	2	2	0	66.0082	23.36	3.8	4.38	0.324925	3.58	134	68	128.51	86.3931	138.098	90.8967	114.764	79.4722
1182	TWD	1	0	0	1	0	1	1	0	67.0493	24.51	#NULL!	6.1	0.406894	2.56	110	70	118.749	75.1333	128.91	79.6244	99.5278	66.2417
1183	YDR	1	1	0	0	0	3	3	1	76.0493	25.08	8.8	5.45	0.284869	3.81	130	80	137.99	82.2285	142.405	85.2217	128.885	76.3613
1184	YXY	1	0	0	0	0	2	2	0	70.326	25.26	5.6	3.17	0.410264	3.56	150	96	133.874	75.7799	137.735	79.593	122.092	68.1556
1185	YZL	1	0	0	0	1	2	2	1	64.3178	27.85	5.6	4.94	0.269357	2.71	179	90	118.113	75.6979	116.913	75.8733	115.147	75.0056
1186	ZDY	1	1	0	0	1	1	1	0	67.2493	24.86	8.5	4.44	0.200988	3.56	140	90	134.843	83	142.942	87.2938	119.219	70.7833
1187	ZJS	1	0	0	0	1	2	2	0	60.5534	27.28	5.2	3.92	0.325462	1.79	146	86	136.24	86.1437	140.187	88.7763	122.423	79.5014
1188	LZH	1	1	0	1	1	3	3	1	61.5507	28.72	6.4	5.2	0.338375	2.77	160	98	138.422	87.0111	134.077	85.1358	141.875	90.5889
1189	CYH	1	0	0	0	0	2	2	0	80.0795	20.25	4.3	5.83	0.337091	2.3	151	68	105.485	63.8799	106.417	66.7383	94.0611	57.4167
1190	DGH	1	0	0	1	1	1	1	1	62.4274	27.43	4.8	3.1	0.302799	3.09	179	103	133.042	91.6924	134.383	94.3825	123.833	84.6
1191	HXZ	1	1	0	0	0	3	3	1	83.137	25.78	7.4	4.38	0.280362	2.08	181	73	125.685	59.5118	131.539	63.1476	119.212	55.2591
1192	HSF	1	1	0	0	1	2	2	1	63.4219	28.04	5.9	4.9	0.331853	3.53	140	100	115.7	80.2875	111.838	76.7524	112.167	76.3333
1193	JBR	1	0	0	0	0	2	2	1	67.7753	29.07	5	5.26	0.287146	2.71	150	100	110.781	70.0285	111.049	71.4322	104.583	61.6667
1194	ZCL	1	0	0	0	0	1	1	0	71.1397	26.63	5.96	4.77	0.30367	2.94	150	100	120.569	75.9847	123.65	78.8533	109.694	65.0661
1195	ZXH	1	0	0	1	0	3	3	1	61.137	26.99	4.6	4.59	0.393877	1.95	133	86	111.042	75.0958	109.007	74.1117	105.264	68.9194
1196	WJH	1	1	1	1	1	2	2	1	60.7233	26.64	11	3.83	0.421189	2.08	173	89	146.228	90.3972	149.788	91.3417	143.667	96.2083
1197	XYL	1	0	0	1	0	3	3	1	80.0356	24.46	4.91	3.68	0.30961	2.2	140	75	116.624	64.0299	122.587	67.7157	111.788	58.7636
1198	HYC	1	1	0	0	0	2	2	1	72.3342	28.72	7.35	4.46	0.422438	3.3	160	90	103.385	66.2243	113.975	73.0434	83.175	54.3389
1199	HWD	1	0	0	0	0	1	1	1	78.1562	22.6	5.7	4.31	0.365196	3.47	120	80	121.812	66.8354	125.472	69.3183	114.939	63.4167
1200	SGX	1	0	0	0	0	1	1	0	62.8493	25.99	5.48	3.96	0.418603	2.3	136	96	118.776	82.2556	126.074	86.0773	104.667	69.7278
1201	ZCJ	1	1	0	0	0	2	2	1	87.1205	24.01	5.8	4.56	0.230281	4.2	130	85	135.422	67.9646	136.222	68.49	127.978	61.3167
1202	SYM	1	0	0	0	0	2	2	0	64.6849	23.61	5.4	2.41	0.30088	2.3	146	92	121.668	81.7972	132.815	86.8464	108.35	76.8444
1203	S	1	0	0	0	0	1	1	1	64.263	25.33	5.4	5.12	0.317655	1.95	176	102	140.979	93.1868	139.727	92.0567	137.272	89.8944
1204	TXD	1	0	0	1	0	3	3	0	68.1151	24.02	5	3.26	0.362925	3.81	160	90	102.196	65.1979	107.578	68.4741	93.0585	58.3203
1205	WAM	1	0	0	0	0	1	1	1	79.0548	23.92	5.71	4.68	0.342899	2.3	130	90	111.913	77.6917	116.163	80.3967	107.429	72.9582
1206	XGF	1	0	0	0	0	1	1	1	69.7562	25.95	4.8	4.45	0.355951	2.71	132	88	112.972	78.5507	106.012	75.68	113.05	76.3778
1207	YJZ	1	0	0	0	0	2	2	1	66.9014	31.14	5.3	4.51	0.258241	3.18	136	92	124.065	79.9875	124.813	83.0767	116.669	73.07
1208	ZMZ	1	0	0	0	0	3	3	1	79.2055	23.32	5.8	3.27	0.318911	3.74	155	90	137.167	79.8924	132.845	77.155	142.685	82.1616
1209	ZSF	1	0	0	0	0	1	1	1	85.1918	23.38	5.42	5.74	0.377201	3.85	160	90	156.611	85.4319	151.815	80.2283	163.678	88.2589
1210	CYT	1	0	0	0	1	2	2	0	69.3781	22.32	6.2	4.87	0.356298	2.08	110	64	131.262	80.0563	139.095	85.0217	122.083	75.2639
1211	JPC	1	0	0	0	1	2	2	1	63.2658	25.66	5.1	4.7	0.432689	2.83	120	90	109.713	82.0771	112.103	83.9889	104.336	77.0778
1212	JZZ	1	0	0	0	0	1	1	1	67.937	32.66	#NULL!	#NULL!	0.28345	3.56	168	106	149.749	88.2701	140.593	86.85	158.831	91.3056
1213	LYK	1	0	0	0	0	3	3	1	77.3671	32.37	3.6	3.67	0.354745	3.64	165	96	137.508	77.6646	125.619	72.621	136.997	80.7061
1214	LZX	1	0	1	1	1	2	2	1	61.9726	27.25	6.2	5.67	0.352918	3.09	140	90	134.672	88.3882	149.019	98.0239	112.144	72.0194
1215	BJR	1	1	0	0	0	1	1	1	85.7808	25.26	4.4	4.75	0.305792	3.3	178	83	152.688	77.2167	154.439	77.4624	145.131	73.7556
1216	CZZ	1	0	0	0	1	1	1	1	64.9644	25.72	4.8	4.54	0.300648	3.83	190	110	125.669	83.2549	126.018	84.955	128.842	79.0889
1217	LXZ	1	1	0	0	0	1	1	1	67.3123	30.86	#NULL!	#NULL!	0.329	3.53	148	86	118.062	70.184	119.035	70.5667	113.182	66.9091
1218	RJG	1	0	0	0	0	2	2	0	60.5479	25.56	6.9	4.43	0.359666	1.95	140	100	137.244	93.5569	143.746	97.9566	125.267	84.1806
1219	WSM	1	0	1	0	0	3	3	1	64.9753	27.07	5.7	3.89	0.317029	2.4	149	72	130.923	80.0083	130.604	78.4808	125.765	77.3913
1220	ZJZ	0	0	0	0	0	2	2	1	63.3726	25.45	4	5.38	0.362119	2.2	130	80	102.076	68.4243	111.003	74.9487	86.9006	57.8287
1221	ZBN	1	0	0	0	1	1	1	1	78.6329	21.77	5.9	3.39	0.262956	3.81	175	91	122.335	70.275	132.731	72.985	112.342	66.2
